# Supplementary material
Source: PubMed Central journal article supplement (PMC4098828)
Supplement: NIHMS561600-supplement-01.pdf [file NIHMS561600-supplement-01.pdf]

( $p < 0.05$ ) from both the 24 and 48 hpf time points were combined to create the regulatory network.

Table 1. Mean percentage of embryos (95 percentile) with malformations observed at 120 hpf following exposure to 25  $\mu$ M BAA, DBT, PYR or DMSO control from 6-48 hpf.

Table 2. Comparison of malformations induced by individual PAH treatments.  $p$  values of Tukey's all pairwise post hoc test are displayed for each comparison, malformations that were significantly different between treatment groups are shaded ( $p < 0.05$ ).

Table 3. Mean log<sub>2</sub> fold change values of differentially regulated transcripts from the microarray, compared with log<sub>2</sub> fold change (mean  $\pm$  SD) detected with QPCR. <sup>a</sup> Significantly different from vehicle control (One-way ANOVA with Tukey's post hoc test and 5% FDR,  $p < 0.05$ ) <sup>b</sup> Significantly different from vehicle control (One-way ANOVA with Tukey's post hoc test,  $p < 0.05$ ).

Table 4. Significantly enriched biological functions identified by DAVID analysis of all transcripts differentially regulated ( $p < 0.05$ ) by BAA exposure or by DBT and PYR at 24 hpf. E score: overall cluster enrichment score, %: percentage of total gene list involved in functional cluster,  $p$ -values determined by modified Fischer's Exact test (EASE score).

Table 5. Significantly enriched biological functions identified by DAVID analysis of all transcripts differentially regulated ( $p < 0.05$ ) in BAA exposed embryos, and common transcripts disrupted by DBT and PYR at 48 hpf. E score: overall cluster enrichment score, %: percentage of total gene list involved in functional cluster,  $p$ -values determined by modified Fischer's Exact test (EASE score).

Table S1. Primer sequences used for qRT-PCR

Table S2. Percent recovery GC-MS method of PAH detection in zebrafish embryos, calculated from laboratory control samples spiked with BAA, DBT or PYR in DMSO.

Table S3. Log<sub>2</sub> fold change and significance values of microarray transcripts significantly differentially expressed (One-way ANOVA with Tukey's post hoc test and 5% FDR,  $p < 0.05$ ) by at least one PAH exposure group compared to control.

Table S4. Transcription factors identified as significantly over-connected ( $p < 0.05$ ) to genes differentially expressed ( $p < 0.05$ ) in response to PAH exposure at 24 and 48 hpf. Significance

was calculated by hypergeometric distribution in MetaCore. Actual: Number of genes in the dataset that interact with the transcription factor, Expected: Number of genes in the dataset predicted to interact with the transcription factor based on total number of interactions on the Agilent platform calculated as mean value for hypergeometric distribution, Ratio: Connectivity ratio (Actual/Expected), p-value: Probability to have the given value of Actual or higher (FDR adjusted p-value <0.05)

## References

- Aguilar-Alonso, P., Martinez-Fong, D., Pazos-Salazar, N. G., Brambila, E., Gonzalez-Barrios, J. A., Mejorada, A., Flores, G., Millan-Perezpena, L., Rubio, H., and Leon-Chavez, B. A. (2008). The increase in zinc levels and upregulation of zinc transporters are mediated by nitric oxide in the cerebral cortex after transient ischemia in the rat. *Brain research* **1200**, 89-98.
- Alexeyenko, A., Wassenberg, D. M., Lobenhofer, E. K., Yen, J., Linney, E., Sonnhammer, E. L., and Meyer, J. N. (2010). Dynamic zebrafish interactome reveals transcriptional mechanisms of dioxin toxicity. *PLoS One* **5**, e10465.
- Andreasen, E. A., Spitsbergen, J. M., Tanguay, R. L., Stegeman, J. J., Heideman, W., and Peterson, R. E. (2002). Tissue-specific expression of AHR2, ARNT2, and CYP1A in zebrafish embryos and larvae: effects of developmental stage and 2,3,7,8-tetrachlorodibenzo-p-dioxin exposure. *Toxicol Sci* **68**, 403-419.
- Archuleta, M. M., Schieven, G. L., Ledbetter, J. A., Deanin, G. G., and Burchiel, S. W. (1993). 7,12-Dimethylbenz[a]anthracene activates protein-tyrosine kinases Fyn and Lck in the HPB-ALL human T-cell line and increases tyrosine phosphorylation of phospholipase C-gamma 1, formation of inositol 1,4,5-trisphosphate, and mobilization of intracellular calcium. *Proc Natl Acad Sci U S A* **90**, 6105-6109.
- Barron, M. G., Heintz, R., and Rice, S. D. (2004). Relative potency of PAHs and heterocycles as aryl hydrocarbon receptor agonists in fish. *Mar Environ Res* **58**, 95-100.
- Benjamini, Y., and Hochberg, Y. (1995). Controlling the False Discovery Rate - a Practical and Powerful Approach to Multiple Testing. *J Roy Stat Soc B Met* **57**, 289-300.
- Binder, R. L., and Stegeman, J. J. (1984). Microsomal electron transport and xenobiotic monooxygenase activities during the embryonic period of development in the killifish, *Fundulus heteroclitus*. *Toxicol Appl Pharmacol* **73**, 432-443.
- Bostrom, C. E., Gerde, P., Hanberg, A., Jernstrom, B., Johansson, C., Kyrklund, T., Rannug, A., Tornqvist, M., Victorin, K., and Westerholm, R. (2002). Cancer risk assessment, indicators, and guidelines for polycyclic aromatic hydrocarbons in the ambient air. *Environ Health Perspect* **110 Suppl 3**, 451-488.
- Brasier, A. R., Jamaluddin, M., Han, Y., Patterson, C., and Runge, M. S. (2000). Angiotensin II induces gene transcription through cell-type-dependent effects on the nuclear factor-kappaB (NF-kappaB) transcription factor. *Mol Cell Biochem* **212**, 155-169.

Table S1

| Ensembl Transcript ID | Zebrafish Gene Symbol | Forward primer          | Reverse Primer          |
|-----------------------|-----------------------|-------------------------|-------------------------|
| ENSDART00000010918    | <i>agt</i>            | TGACGGACACACAGTTTAC     | GTTGCTCAGGTTGAAATGC     |
| ENSDART000000105896   | <i>atp2a1l</i>        | AGCAGTTCATTCGTTACCTG    | AGAACAACCAGCCAGAAATC    |
| ENSDART00000077511    | <i>ccr9a</i>          | GCATGTTGGTATTTGAAGCC    | CTGTGTCCGACATAACAGAG    |
| ENSDART00000066439    | <i>ch25h</i>          | ACCACAAATACACATCCACC    | TCATTCAAAGTGCAAGTGTCC   |
| ENSDART00000017756    | <i>ctsl.1</i>         | GGACTCCTACCCCTATGAAG    | ATAACCAACAGCCAGAACAC    |
| ENSDART00000038200    | <i>cyp1a</i>          | TGCCGATTTTCATCCCTTTCC   | AGAGCCGTGCTGATAGTGTC    |
| ENSDART00000099870    | <i>cyp1b1</i>         | CTGCATTGATTTCCGAGACGTG  | CACACTCCGTGTTGACAGC     |
| ENSDART00000019953    | <i>cyp1c1</i>         | AGTGGCACAGTCTACTTTGAGAG | TCGTCCATCAGCACTCAG      |
| ENSDART00000016487    | <i>cyp1c2</i>         | GTGGTGGAGCACAGACTAAG    | TTCAGTATGAGCCTCAGTCAAAC |
| ENSDART000000103784   | <i>edn2</i>           | CCAGGATCAGCTAGAGAGAG    | ATTTCACTGGTGTGGAAGAG    |
| ENSDART000000109464   | <i>g0s2</i>           | ATAACCACCGACAAACAAGG    | AGCATGTCAAAGTCTGGTTC    |
| ENSDART000000100386   | <i>mstnb</i>          | AAGAGGACGATGAACATGC     | GATCGTATTCGGTGTCTTCC    |
| ENSDART00000025669    | <i>slc16a9b</i>       | TCCCTGTCAACCAAGAACTAC   | TGAAGTAAACGCCAGATCG     |
| ENSDART000000130131   | <i>sult6b1</i>        | GTGGGTTTAACTGGATGGTG    | GAGACCACTGTGTCTTTCG     |
| ENSDART00000017569    | <i>tnfb</i>           | GTCCTACAGCACCATTTACC    | ATTCAGTGCACAACCTCTCAC   |

**Table S2**

| Spike<br>(nmoles) | Average Detected<br>(nmoles) | Percent<br>Recovery | Standard<br>Deviation |
|-------------------|------------------------------|---------------------|-----------------------|
| BAA 24 hpf        |                              |                     |                       |
| 5                 | 4.45                         | 89.07               | 3.74                  |
| 25                | 22.14                        | 88.57               | 5.75                  |
| 50                | 47.19                        | 94.39               | 3.83                  |
| 125               | 118.55                       | 94.84               | 4.86                  |
| DBT 24 hpf        |                              |                     |                       |
| 5                 | 5.07                         | 101.37              | 2.47                  |
| 25                | 25.03                        | 100.14              | 1.68                  |
| 50                | 49.94                        | 99.88               | 3.78                  |
| 125               | 134.50                       | 107.60              | 2.55                  |
| PYR 24 hpf        |                              |                     |                       |
| 5                 | 5.48                         | 109.68              | 3.98                  |
| 25                | 29.11                        | 116.43              | 10.33                 |
| 50                | 61.55                        | 123.11              | 5.15                  |
| 125               | 156.69                       | 125.35              | 10.56                 |
| BAA 48 hpf        |                              |                     |                       |
| 5                 | 4.55                         | 91.05               | 1.05                  |
| 25                | 20.07                        | 80.27               | 1.53                  |
| 50                | 44.09                        | 88.18               | 3.03                  |
| 125               | 111.25                       | 89.00               | 2.45                  |
| DBT 48 hpf        |                              |                     |                       |
| 5                 | 5.29                         | 105.72              | 3.09                  |
| 25                | 25.96                        | 103.84              | 3.32                  |
| 50                | 51.19                        | 102.39              | 4.70                  |
| 125               | 136.17                       | 108.94              | 2.94                  |
| PYR 48 hpf        |                              |                     |                       |
| 5                 | 5.12                         | 102.31              | 6.14                  |
| 25                | 25.84                        | 103.35              | 3.70                  |
| 50                | 55.96                        | 111.93              | 4.23                  |
| 125               | 144.70                       | 115.76              | 5.23                  |

**Table S4.** Transcription factors predicted to regulate transcripts significantly differentially expressed in response to PAH exposure

| Network Object Name | 24 hpf     |              |           |             |                |                  |               |                 | 48 hpf     |              |           |             |                |                  |               |                 |
|---------------------|------------|--------------|-----------|-------------|----------------|------------------|---------------|-----------------|------------|--------------|-----------|-------------|----------------|------------------|---------------|-----------------|
|                     | BAA Actual | BAA Expected | BAA Ratio | BAA p-value | DBT-PYR Actual | DBT-PYR Expected | DBT-PYR Ratio | DBT-PYR p-value | BAA Actual | BAA Expected | BAA Ratio | BAA p-value | DBT-PYR Actual | DBT-PYR Expected | DBT-PYR Ratio | DBT-PYR p-value |
| AHR                 | 4.00       | 0.51         | 7.78      | 1.53E-03    |                |                  |               |                 |            |              |           |             |                |                  |               |                 |
| TFAP2A              |            |              |           |             |                |                  |               |                 | 10.00      | 2.65         | 3.77      | 2.81E-04    |                |                  |               |                 |
| ARNT                | 4.00       | 0.13         | 30.03     | 8.38E-06    |                |                  |               |                 | 5.00       | 0.69         | 7.29      | 6.08E-04    |                |                  |               |                 |
| CEBPD               | 3.00       | 0.19         | 15.68     | 8.74E-04    |                |                  |               |                 | 6.00       | 0.95         | 6.31      | 3.66E-04    |                |                  |               |                 |
| JUN                 |            |              |           |             | 19.00          | 9.07             | 2.09          | 1.95E-03        |            |              |           |             | 25.00          | 13.87            | 1.80          | 3.29E-03        |
| CREB1               |            |              |           |             |                |                  |               |                 | 14.00      | 5.14         | 2.73      | 4.69E-04    | 55.00          | 30.53            | 1.80          | 1.31E-05        |
| CUX1                |            |              |           |             |                |                  |               |                 | 6.00       | 0.60         | 9.97      | 2.95E-05    |                |                  |               |                 |
| EGR2                |            |              |           |             |                |                  |               |                 |            |              |           |             | 9.00           | 3.10             | 2.90          | 3.81E-03        |
| EN1                 |            |              |           |             | 4.00           | 0.33             | 12.21         | 2.58E-04        |            |              |           |             |                |                  |               |                 |
| ERG                 |            |              |           |             |                |                  |               |                 |            |              |           |             | 8.00           | 1.38             | 5.81          | 5.67E-05        |
| ESR1                |            |              |           |             | 37.00          | 19.46            | 1.90          | 1.12E-04        |            |              |           |             |                |                  |               |                 |
| ESR2                |            |              |           |             | 11.00          | 2.89             | 3.81          | 1.51E-04        |            |              |           |             |                |                  |               |                 |
| FOXO1               |            |              |           |             |                |                  |               |                 |            |              |           |             | 15.00          | 3.91             | 3.83          | 8.20E-06        |
| FOSL2               |            |              |           |             |                |                  |               |                 |            |              |           |             | 6.00           | 1.13             | 5.32          | 7.97E-04        |
| NR3C1               |            |              |           |             | 26.00          | 12.96            | 2.01          | 5.73E-04        | 10.00      | 3.09         | 3.24      | 9.31E-04    |                |                  |               |                 |
| GLI1                |            |              |           |             |                |                  |               |                 |            |              |           |             | 7.00           | 1.50             | 4.66          | 6.80E-04        |
| HBP1                |            |              |           |             |                |                  |               |                 |            |              |           |             | 3.00           | 0.19             | 15.97         | 5.68E-04        |
| HES1                |            |              |           |             | 6.00           | 1.19             | 5.05          | 1.16E-03        |            |              |           |             |                |                  |               |                 |
| HOXB1               |            |              |           |             |                |                  |               |                 |            |              |           |             | 3.00           | 0.19             | 15.97         | 5.68E-04        |
| IRF4                |            |              |           |             |                |                  |               |                 |            |              |           |             | 6.00           | 1.44             | 4.17          | 2.95E-03        |
| JUND                |            |              |           |             |                |                  |               |                 |            |              |           |             | 12.00          | 3.82             | 3.14          | 4.38E-04        |
| KLF4                |            |              |           |             |                |                  |               |                 |            |              |           |             | 14.00          | 5.54             | 2.53          | 1.35E-03        |
| KLF5                |            |              |           |             |                |                  |               |                 |            |              |           |             | 6.00           | 0.81             | 7.37          | 1.23E-04        |
| NR1H3               |            |              |           |             |                |                  |               |                 |            |              |           |             | 9.00           | 2.69             | 3.34          | 1.45E-03        |
| MYEF2               |            |              |           |             |                |                  |               |                 |            |              |           |             | 2.00           | 0.06             | 31.94         | 9.78E-04        |
| NFATC4              |            |              |           |             | 4.00           | 0.45             | 8.88          | 9.40E-04        |            |              |           |             |                |                  |               |                 |
| NFE2L2              |            |              |           |             |                |                  |               |                 | 7.00       | 1.19         | 5.89      | 1.77E-04    |                |                  |               |                 |
| REST                |            |              |           |             |                |                  |               |                 |            |              |           |             | 20.00          | 9.99             | 2.00          | 2.55E-03        |
| NR4A2               |            |              |           |             | 5.00           | 0.76             | 6.60          | 8.84E-04        |            |              |           |             |                |                  |               |                 |
| OTX2                |            |              |           |             |                |                  |               |                 |            |              |           |             | 6.00           | 1.38             | 4.36          | 2.34E-03        |
| TP53                |            |              |           |             |                |                  |               |                 |            |              |           |             | 42.00          | 27.11            | 1.55          | 3.05E-03        |
| PITX2               |            |              |           |             |                |                  |               |                 |            |              |           |             | 8.00           | 1.66             | 4.82          | 2.22E-04        |
| PPARA               |            |              |           |             | 13.00          | 2.50             | 5.20          | 1.25E-06        |            |              |           |             | 13.00          | 3.82             | 3.40          | 1.14E-04        |
| PKNOX1              |            |              |           |             |                |                  |               |                 |            |              |           |             | 3.00           | 0.28             | 10.65         | 2.22E-03        |

**Table S4.** Transcription factors predicted to regulate transcripts significantly differentially expressed in response to PAH exposure

|        |       |       |       |          |       |       |      |          |        |       |       |          |          |
|--------|-------|-------|-------|----------|-------|-------|------|----------|--------|-------|-------|----------|----------|
| PGR    |       |       |       |          |       |       |      |          |        | 17.00 | 6.07  | 2.80     | 1.28E-04 |
| RARA   |       |       |       |          |       |       |      |          |        | 10.00 | 3.69  | 2.71     | 3.90E-03 |
| RELA   | 24.00 | 11.39 | 2.11  | 4.65E-04 | 16.00 | 3.81  | 4.20 | 7.49E-07 | 35.00  | 17.41 | 2.01  | 6.65E-05 |          |
| RORA   | 10.00 | 2.46  | 4.07  | 1.76E-04 |       |       |      |          |        |       |       |          |          |
| RXRA   | 10.00 | 2.68  | 3.73  | 3.59E-04 |       |       |      |          | 11.00  | 4.10  | 2.68  | 2.71E-03 |          |
| SF1    |       |       |       |          |       |       |      |          | 9.00   | 2.38  | 3.78  | 5.89E-04 |          |
| SIX1   | 5.00  | 0.53  | 9.39  | 1.60E-04 |       |       |      |          |        |       |       |          |          |
| SIX4   | 3.00  | 0.20  | 14.65 | 9.16E-04 |       |       |      |          |        |       |       |          |          |
| SOX5   |       |       |       |          |       |       |      |          | 11.00  | 3.29  | 3.35  | 4.39E-04 |          |
| SOX6   |       |       |       |          |       |       |      |          | 5.00   | 0.72  | 6.94  | 6.19E-04 |          |
| SP1    | 74.00 | 48.31 | 1.53  | 5.79E-05 | 24.00 | 11.95 | 2.01 | 3.48E-04 | 112.00 | 73.86 | 1.52  | 1.38E-06 |          |
| SP3    |       |       |       |          | 9.00  | 1.97  | 4.56 | 1.45E-04 |        |       |       |          |          |
| STAT5A |       |       |       |          |       |       |      |          | 13.00  | 4.10  | 3.17  | 2.34E-04 |          |
| TBP    |       |       |       |          |       |       |      |          | 27.00  | 15.03 | 1.80  | 2.40E-03 |          |
| TCF7L2 |       |       |       |          |       |       |      |          | 17.00  | 6.67  | 2.55  | 3.88E-04 |          |
| TWIST2 |       |       |       |          |       |       |      |          | 2.00   | 0.06  | 31.94 | 9.78E-04 |          |
| UBTF   |       |       |       |          |       |       |      |          | 2.00   | 0.06  | 31.94 | 9.78E-04 |          |
| YY1    |       |       |       |          |       |       |      |          | 30.00  | 15.56 | 1.93  | 4.52E-04 |          |
